# Supplementary material for: Adaptation of the Foot and Ankle Physical Exam for Telehealth
Source: HSS J. 2021 Feb 21;17(1):85–90. doi: 10.1177/1556331620974675 (PMC8077985; doi:10.1177/1556331620974675)
Supplement: sj-zip-1-hss-10.1177_1556331620974675 – Supplemental material for Adaptation of the Foot and Ankle Physical Exam for Telehealth [file sj-zip-1-hss-10.1177_1556331620974675.zip]

Archive with 4 entries (4 files):
- coi_disclosure_Eble.pdf
- coi_disclosure_Hansen.pdf
- coi_disclosure_Drakos.pdf
- COI form ellis.pdf
